# Supplementary material
Source: PubMed Central journal article supplement (PMC4567985)
Supplement: 12687_2015_229_MOESM1_ESM.pdf [file 12687_2015_229_MOESM1_ESM.pdf]

# Knowledge and Perceptions Medical Professionals 2013

## \*1. Are you...

- Male
- Female

## \*2. Please indicate your specialty area

- Cardiology
- General Practice
- Other (please specify)

## \*3. Please select your level of training

- Registrar
- Consultant/General Practitioner
- Other (please specify)

## \*4. Please indicate where you completed medical school

- Australia
- Other (please specify)

## \*5. Please indicated your main geographical area of practice

- Hobart/Southern Tasmania
- Launceston/Northern Tasmania
- Burnie-Devonport/North-Western Tasmania
- Other (please specify)

## \*6. Please indicate approximately how long you have been practising medicine for:

- 0-5 years
- 6-10 years
- 10-15 years
- 16-20 years
- 20-25 years
- 26-30 years
- 31+ years

# Knowledge and Perceptions Medical Professionals 2013

## \*7. Do you have a genetic heart condition?

- Yes
- No

## 8. If yes, please indicate which condition

- Hypertrophic Cardiomyopathy
- Familial Dilated Cardiomyopathy
- Long QT Syndrome
- Bicuspid Aortic Valve
- Would rather not say
- Other (please specify)

## \*9. As a part of routine history taking, do you take a targeted/detailed family history?

- Never
- Sometimes
- Only when appropriate
- Always

## \*10. Please consider the following general statements:

|                                                                                                                          | Strongly Disagree     | Disagree              | Unsure                | Agree                 | Strongly Agree        |
|--------------------------------------------------------------------------------------------------------------------------|-----------------------|-----------------------|-----------------------|-----------------------|-----------------------|
| I believe patient education is always important                                                                          | <input type="radio"/> |
| I believe appropriate patient education improves patient outcomes                                                        | <input type="radio"/> |
| If a person is diagnosed with a genetic condition, it is important to educate the person about their condition           | <input type="radio"/> |
| If a person is diagnosed with a genetic condition, it is important to educate their family members about their condition | <input type="radio"/> |
| I routinely educate patients and their relatives about their genetic condition                                           | <input type="radio"/> |
| I feel confident talking to patients and their families about their genetic condition (cardiac or otherwise)             | <input type="radio"/> |

# Knowledge and Perceptions Medical Professionals 2013

## \*11. Please consider the following statements:

|                                                                                                                                           | Strongly Disagree     | Disagree              | Unsure                | Agree                 | Strongly Agree        |
|-------------------------------------------------------------------------------------------------------------------------------------------|-----------------------|-----------------------|-----------------------|-----------------------|-----------------------|
| Patients with genetic conditions should be counselled about recommendations for family screening                                          | <input type="radio"/> |
| Patients with genetic conditions should routinely be referred for genetic counselling                                                     | <input type="radio"/> |
| Patients with genetic cardiac conditions associated with sudden death should be counselled about recommendations for family screening     | <input type="radio"/> |
| Patients with genetic cardiac conditions NOT associated with sudden death should be counselled about recommendations for family screening | <input type="radio"/> |
| I feel confident answering a patient's questions about genetic cardiac conditions                                                         | <input type="radio"/> |

## 12. Who do you believe should be involved in providing care for a patient with genetic heart disease? Please list all appropriate people you consider would be a part of the treating team.

## 13. If a patient asked you where they may find additional information about their condition, where would you suggest they look? Please list all sources you would consider.

## \*14. Have you heard of the Tasmanian Genetic Counselling Service?

- Yes
- No

# Knowledge and Perceptions Medical Professionals 2013

## \*15. Do you know anything about its role and how it works?

- Yes, I know a lot
- Yes, I know a little
- No, I just know it exists
- No, I don't know anything about it

## \*16. Do you routinely refer patients with genetic conditions to the counselling service?

- Yes
- Sometimes
- If the patient asks for it
- No
- Other (please specify)

## \*17. Please indicate if you manage patients in your practice with the following genetic cardiac conditions

|                                                       | Yes - less than 5     | Yes - more than 5     | Not to my knowledge   |
|-------------------------------------------------------|-----------------------|-----------------------|-----------------------|
| Familial dilated cardiomyopathy                       | <input type="radio"/> | <input type="radio"/> | <input type="radio"/> |
| Arrhythmogenic right ventricular cardiomyopathy       | <input type="radio"/> | <input type="radio"/> | <input type="radio"/> |
| Left-ventricular non-compaction                       | <input type="radio"/> | <input type="radio"/> | <input type="radio"/> |
| Restrictive cardiomyopathy                            | <input type="radio"/> | <input type="radio"/> | <input type="radio"/> |
| Catecholaminergic polymorphic ventricular tachycardia | <input type="radio"/> | <input type="radio"/> | <input type="radio"/> |
| Long QT syndrome                                      | <input type="radio"/> | <input type="radio"/> | <input type="radio"/> |
| Brugada syndrome                                      | <input type="radio"/> | <input type="radio"/> | <input type="radio"/> |
| Hypertrophic cardiomyopathy                           | <input type="radio"/> | <input type="radio"/> | <input type="radio"/> |
| Bicuspid aortic valve                                 | <input type="radio"/> | <input type="radio"/> | <input type="radio"/> |

# Knowledge and Perceptions Medical Professionals 2013

**\*18. For each of the genetic cardiac conditions listed, please rate how likely you are to refer these specific conditions to a genetic counsellor.**

**There is no right or wrong answer: we're interested in your opinion.**

|                                                       | Always                | Sometimes             | Rarely                | Never                 | Unsure                |
|-------------------------------------------------------|-----------------------|-----------------------|-----------------------|-----------------------|-----------------------|
| Familial dilated cardiomyopathy                       | <input type="radio"/> |
| Arrhythmogenic right ventricular cardiomyopathy       | <input type="radio"/> |
| Left-ventricular non-compaction                       | <input type="radio"/> |
| Restrictive cardiomyopathy                            | <input type="radio"/> |
| Catecholaminergic polymorphic ventricular tachycardia | <input type="radio"/> |
| Long QT syndrome                                      | <input type="radio"/> |
| Brugada syndrome                                      | <input type="radio"/> |
| Hypertrophic cardiomyopathy                           | <input type="radio"/> |
| Bicuspid aortic valve                                 | <input type="radio"/> |

**19. What influences your choice to refer/not refer the above genetic cardiac conditions to genetic counselling?**

**\*20. As I'm actively practicing...**

|                                                                                                                         | Strongly Disagree     | Disagree              | Unsure                | Agree                 | Strongly Agree        |
|-------------------------------------------------------------------------------------------------------------------------|-----------------------|-----------------------|-----------------------|-----------------------|-----------------------|
| I feel confident I understand the theory of genetics                                                                    | <input type="radio"/> |
| I feel confident about the amount of knowledge I have regarding genetic cardiac diseases                                | <input type="radio"/> |
| I feel confident that I know enough to appropriately manage genetic cardiac diseases presenting in my clinical practice | <input type="radio"/> |

**21. Please feel free to add any comments you'd like to make about the survey, or in general:**

Thank you for participating - your time is appreciated.
